# Supplementary material for: Statistical Analysis of Climate Trends and Impacts on Groundwater Sustainability in the Lower Indus Basin
Source: MDPI journal article supplement (doi:10.3390/su16010441), 2024-01-04
Supplement: s1 [file s1]

## Supplementary Material

**Table S1.** Statistical Analysis of Average Precipitation (mm/day) of RCP 4.5 along with Mann-Kendall and Sen's slope estimator for the years 2010 to 2099.

| ZONE 1  |        |        |       |        |        |        |        |        |       |       |       |       |
|---------|--------|--------|-------|--------|--------|--------|--------|--------|-------|-------|-------|-------|
|         | Jan    | Feb    | Mar   | Apr    | May    | Jun    | Jul    | Aug    | Sep   | Oct   | Nov   | Dec   |
| Mean    | 0.235  | 0.396  | 0.347 | 0.249  | 0.277  | 0.552  | 1.341  | 2.074  | 1.926 | 1.173 | 0.427 | 0.210 |
| Median  | 0.079  | 0.076  | 0.048 | 0.034  | 0.056  | 0.256  | 0.353  | 0.905  | 1.205 | 0.671 | 0.176 | 0.074 |
| Max     | 2.045  | 3.833  | 3.646 | 2.844  | 2.693  | 3.032  | 10.338 | 10.943 | 8.391 | 5.405 | 2.640 | 1.507 |
| Min     | 0.000  | 0.000  | 0.000 | 0.000  | 0.000  | 0.000  | 0.000  | 0.000  | 0.000 | 0.000 | 0.000 | 0.000 |
| St.dev  | 0.367  | 0.678  | 0.685 | 0.520  | 0.481  | 0.747  | 2.069  | 2.624  | 2.047 | 1.439 | 0.593 | 0.293 |
| MK (Z)  | -1.311 | -0.137 | 0.849 | -1.185 | -0.496 | -3.166 | -3.852 | -1.932 | 2.095 | 4.451 | 2.724 | 1.341 |
| Sen (Q) | 0.000  | 0.000  | 0.000 | 0.000  | 0.000  | -0.005 | -0.011 | -0.007 | 0.011 | 0.017 | 0.003 | 0.000 |
| ZONE 3  |        |        |       |        |        |        |        |        |       |       |       |       |
|         | Jan    | Feb    | Mar   | Apr    | May    | Jun    | Jul    | Aug    | Sep   | Oct   | Nov   | Dec   |
| Mean    | 0.229  | 0.365  | 0.334 | 0.227  | 0.222  | 0.449  | 1.097  | 1.497  | 1.220 | 0.680 | 0.265 | 0.166 |
| Median  | 0.067  | 0.082  | 0.081 | 0.055  | 0.027  | 0.216  | 0.379  | 0.843  | 0.693 | 0.341 | 0.111 | 0.058 |
| Max     | 2.590  | 3.186  | 5.374 | 3.838  | 2.428  | 3.127  | 7.881  | 8.338  | 6.260 | 3.570 | 3.331 | 1.502 |
| Min     | 0.000  | 0.000  | 0.000 | 0.000  | 0.000  | 0.000  | 0.000  | 0.000  | 0.000 | 0.000 | 0.000 | 0.000 |
| St.dev  | 0.369  | 0.557  | 0.672 | 0.507  | 0.418  | 0.648  | 1.733  | 1.942  | 1.346 | 0.820 | 0.495 | 0.268 |
| MK (Z)  | -1.207 | -0.246 | 0.723 | -0.688 | -1.201 | -3.030 | -3.415 | -1.469 | 1.674 | 3.397 | 2.057 | 0.776 |
| Sen (Q) | 0.000  | 0.000  | 0.000 | 0.000  | 0.000  | -0.003 | -0.008 | -0.004 | 0.005 | 0.007 | 0.001 | 0.000 |

**Table S2.** Statistical Analysis of Average Precipitation (mm/day) of RCP 8.5 along with Mann-Kendall and Sen's slope estimator for the years 2010 to 2099.

| ZONE 1  |       |       |       |        |        |        |        |        |        |       |       |       |
|---------|-------|-------|-------|--------|--------|--------|--------|--------|--------|-------|-------|-------|
|         | Jan   | Feb   | Mar   | Apr    | May    | Jun    | Jul    | Aug    | Sep    | Oct   | Nov   | Dec   |
| Mean    | 0.200 | 0.259 | 0.275 | 0.288  | 0.283  | 0.466  | 1.344  | 2.509  | 2.395  | 1.117 | 0.509 | 0.241 |
| Median  | 0.050 | 0.053 | 0.049 | 0.068  | 0.076  | 0.120  | 0.364  | 1.617  | 1.453  | 0.699 | 0.229 | 0.108 |
| Max     | 2.057 | 6.036 | 2.986 | 5.272  | 3.414  | 4.231  | 6.853  | 11.495 | 15.908 | 6.331 | 3.906 | 1.688 |
| Min     | 0.000 | 0.000 | 0.000 | 0.000  | 0.000  | 0.000  | 0.000  | 0.000  | 0.000  | 0.000 | 0.000 | 0.000 |
| St.dev  | 0.347 | 0.674 | 0.568 | 0.790  | 0.618  | 0.829  | 1.858  | 2.724  | 3.104  | 1.241 | 0.733 | 0.361 |
| MK (Z)  | 0.017 | 0.599 | 0.777 | -1.418 | -1.623 | -4.301 | -3.740 | -1.315 | 1.360  | 3.789 | 1.593 | 1.573 |
| Sen (Q) | 0.000 | 0.000 | 0.000 | 0.000  | 0.000  | -0.004 | -0.012 | -0.008 | 0.009  | 0.012 | 0.001 | 0.001 |
| ZONE 3  |       |       |       |        |        |        |        |        |        |       |       |       |
|         | Jan   | Feb   | Mar   | Apr    | May    | Jun    | Jul    | Aug    | Sep    | Oct   | Nov   | Dec   |
| Mean    | 0.195 | 0.246 | 0.253 | 0.237  | 0.253  | 0.350  | 0.983  | 1.739  | 1.531  | 0.707 | 0.367 | 0.233 |
| Median  | 0.063 | 0.068 | 0.059 | 0.046  | 0.063  | 0.072  | 0.151  | 0.983  | 0.870  | 0.404 | 0.174 | 0.085 |
| Max     | 1.836 | 3.333 | 3.498 | 2.742  | 2.630  | 3.392  | 6.354  | 7.719  | 9.873  | 5.404 | 3.643 | 1.968 |
| Min     | 0.000 | 0.000 | 0.000 | 0.000  | 0.000  | 0.000  | 0.000  | 0.000  | 0.000  | 0.000 | 0.000 | 0.000 |
| St.dev  | 0.329 | 0.463 | 0.518 | 0.472  | 0.495  | 0.629  | 1.546  | 2.057  | 2.060  | 0.972 | 0.609 | 0.366 |
| MK (Z)  | 0.356 | 0.414 | 0.326 | -1.148 | -1.641 | -3.877 | -3.413 | -1.040 | 1.339  | 3.231 | 0.656 | 1.099 |
| Sen (Q) | 0.000 | 0.000 | 0.000 | 0.000  | 0.000  | -0.003 | -0.006 | -0.003 | 0.005  | 0.006 | 0.000 | 0.000 |

**Table S3.** Statistical Analysis of Potential Evapotranspiration data of RCP 4.5 along with Mann-Kendall and Sen's slope estimator for the years 2010 to 2099.

| ZONE 1  |       |        |        |        |        |       |       |       |       |       |        |        |
|---------|-------|--------|--------|--------|--------|-------|-------|-------|-------|-------|--------|--------|
|         | Jan   | Feb    | Mar    | Apr    | May    | Jun   | Jul   | Aug   | Sep   | Oct   | Nov    | Dec    |
| Mean    | 4.231 | 4.534  | 5.127  | 6.196  | 7.035  | 7.574 | 7.552 | 6.884 | 6.459 | 5.837 | 5.337  | 4.676  |
| Median  | 4.132 | 4.531  | 5.095  | 6.246  | 7.038  | 7.556 | 7.595 | 6.893 | 6.481 | 5.885 | 5.442  | 4.690  |
| Max     | 5.256 | 5.100  | 6.123  | 6.950  | 7.610  | 8.028 | 8.021 | 7.424 | 6.862 | 6.199 | 6.006  | 5.668  |
| Min     | 3.449 | 3.949  | 4.400  | 5.340  | 6.387  | 7.024 | 6.962 | 6.344 | 5.902 | 4.996 | 4.244  | 3.811  |
| St.dev  | 0.374 | 0.240  | 0.364  | 0.415  | 0.274  | 0.169 | 0.242 | 0.258 | 0.214 | 0.251 | 0.410  | 0.492  |
| MK (Z)  | 8.609 | -0.167 | -7.939 | -8.978 | -7.131 | 1.108 | 8.518 | 9.361 | 8.483 | 7.960 | 9.557  | 10.532 |
| Sen (Q) | 0.012 | 0.000  | -0.011 | -0.013 | -0.008 | 0.001 | 0.008 | 0.008 | 0.006 | 0.007 | 0.013  | 0.017  |
| ZONE 3  |       |        |        |        |        |       |       |       |       |       |        |        |
|         | Jan   | Feb    | Mar    | Apr    | May    | Jun   | Jul   | Aug   | Sep   | Oct   | Nov    | Dec    |
| Mean    | 4.178 | 4.457  | 5.053  | 6.176  | 7.139  | 7.792 | 7.789 | 7.066 | 6.582 | 5.899 | 5.353  | 4.653  |
| Median  | 4.100 | 4.470  | 4.991  | 6.214  | 7.164  | 7.812 | 7.826 | 7.061 | 6.595 | 5.957 | 5.452  | 4.677  |
| Max     | 5.239 | 5.027  | 6.136  | 7.107  | 8.007  | 8.273 | 8.301 | 7.653 | 7.091 | 6.367 | 6.062  | 5.653  |
| Min     | 3.302 | 3.816  | 4.353  | 5.295  | 6.378  | 7.214 | 7.170 | 6.466 | 5.950 | 4.937 | 4.140  | 3.737  |
| St.dev  | 0.388 | 0.240  | 0.383  | 0.465  | 0.343  | 0.204 | 0.275 | 0.291 | 0.247 | 0.291 | 0.448  | 0.511  |
| MK (Z)  | 8.776 | 0.258  | -8.260 | -9.062 | -7.514 | 0.153 | 8.162 | 9.480 | 9.090 | 9.034 | 10.086 | 10.651 |
| Sen (Q) | 0.012 | 0.000  | -0.011 | -0.015 | -0.010 | 0.000 | 0.008 | 0.010 | 0.008 | 0.009 | 0.015  | 0.018  |

**Table S4.** Statistical Analysis of Potential Evapotranspiration data of RCP 8.5 along with Mann-Kendall and Sen's slope estimator for the years 2010 to 2099.

| ZONE-1  |       |       |        |        |        |       |        |        |       |        |        |        |
|---------|-------|-------|--------|--------|--------|-------|--------|--------|-------|--------|--------|--------|
|         | Jan   | Feb   | Mar    | Apr    | May    | Jun   | Jul    | Aug    | Sep   | Oct    | Nov    | Dec    |
| Mean    | 4.424 | 4.747 | 5.374  | 6.485  | 7.304  | 7.806 | 7.687  | 6.941  | 6.500 | 5.889  | 5.409  | 4.801  |
| Median  | 4.290 | 4.725 | 5.371  | 6.540  | 7.294  | 7.782 | 7.679  | 6.924  | 6.501 | 5.948  | 5.477  | 4.779  |
| Max     | 5.654 | 5.314 | 6.142  | 7.113  | 7.820  | 8.595 | 8.482  | 7.599  | 7.070 | 6.422  | 6.246  | 6.129  |
| Min     | 3.402 | 3.885 | 4.517  | 5.672  | 6.824  | 7.216 | 7.001  | 6.444  | 5.958 | 5.071  | 4.189  | 3.661  |
| St.dev  | 0.545 | 0.293 | 0.276  | 0.301  | 0.217  | 0.297 | 0.356  | 0.287  | 0.246 | 0.316  | 0.549  | 0.701  |
| MK (Z)  | 9.612 | 4.503 | -4.085 | -4.057 | 1.415  | 9.340 | 11.202 | 10.358 | 9.675 | 9.835  | 10.916 | 11.487 |
| Sen (Q) | 0.019 | 0.006 | -0.004 | -0.005 | 0.001  | 0.009 | 0.013  | 0.010  | 0.008 | 0.011  | 0.020  | 0.026  |
| ZONE-3  |       |       |        |        |        |       |        |        |       |        |        |        |
|         | Jan   | Feb   | Mar    | Apr    | May    | Jun   | Jul    | Aug    | Sep   | Oct    | Nov    | Dec    |
| Mean    | 4.370 | 4.662 | 5.296  | 6.482  | 7.430  | 8.061 | 7.969  | 7.142  | 6.632 | 5.965  | 5.428  | 4.775  |
| Median  | 4.217 | 4.649 | 5.297  | 6.483  | 7.436  | 8.046 | 7.923  | 7.074  | 6.645 | 6.035  | 5.477  | 4.799  |
| Max     | 5.700 | 5.222 | 6.254  | 7.327  | 7.971  | 8.768 | 8.825  | 7.887  | 7.220 | 6.548  | 6.403  | 6.220  |
| Min     | 3.335 | 3.773 | 4.405  | 5.540  | 6.780  | 7.196 | 7.188  | 6.587  | 6.044 | 5.108  | 4.159  | 3.616  |
| St.dev  | 0.570 | 0.304 | 0.302  | 0.361  | 0.251  | 0.317 | 0.425  | 0.344  | 0.276 | 0.354  | 0.590  | 0.732  |
| MK (Z)  | 9.682 | 4.810 | -4.538 | -4.879 | -0.558 | 9.250 | 11.034 | 10.121 | 9.515 | 10.031 | 11.097 | 11.453 |
| Sen (Q) | 0.019 | 0.007 | -0.005 | -0.007 | -0.001 | 0.010 | 0.015  | 0.012  | 0.009 | 0.012  | 0.021  | 0.027  |
